# Supplementary material
Source: publisher site journal article supplement (https://www.dovepress.com/article/230314)

## **Supplemental Digital Content**

Application of the Adaptive Validation Substudy Design to Colorectal Cancer Recurrence

**Author List:** Lindsay J. Collin,<sup>1</sup> Anders Riis,<sup>2</sup> Richard F. MacLehose,<sup>3</sup> Thomas P. Ahern,<sup>4</sup> Rune Erichsen,<sup>2,5</sup> Ole Thorlacius-Ussing,<sup>6</sup> Timothy L. Lash<sup>1</sup>

### **Author Affiliations:**

<sup>1</sup>Department of Epidemiology, Emory University, Atlanta, GA; <sup>2</sup>Department of Clinical Epidemiology, Aarhus University, Aarhus, Denmark; <sup>3</sup>Division of Epidemiology and Community Health, University of Minnesota, Minneapolis, MN; <sup>4</sup>Department of Surgery, The Robert Larner, M.D. College of Medicine at The University of Vermont, Burlington, VT; <sup>5</sup>Department of Surgery, Randers Regional Hospital, Randers, Denmark; <sup>6</sup>Department of Gastrointestinal Surgery, Aalborg University Hospital, Aalborg, Denmark

**Figure S1.** Adaptive validation using A) 10-person and B) 20-person validation at a time among CRC recurrences identified through the algorithm to estimate the positive and negative predictive values.

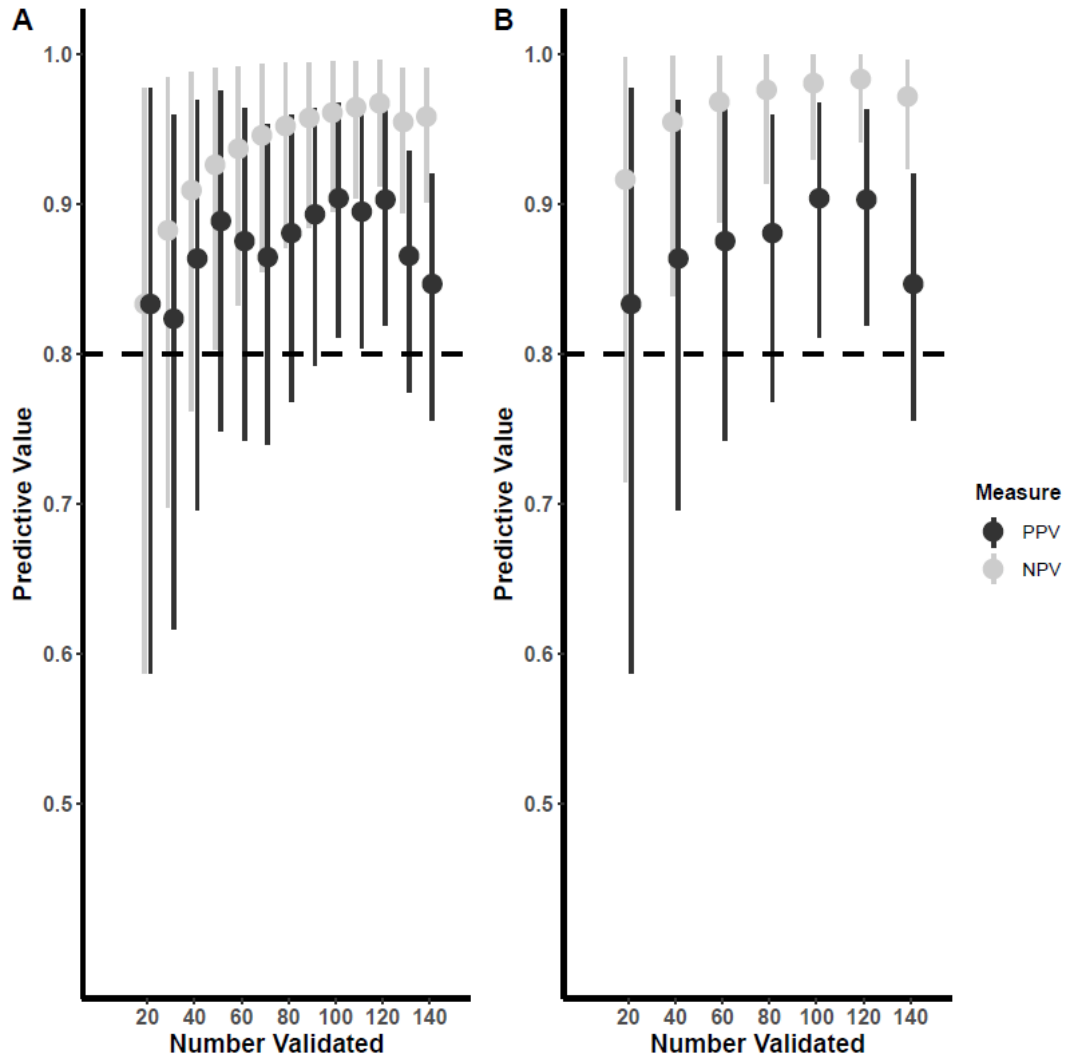

**Figure S2.** Adaptive validation using A) 10-person and B) 20-person validation at a time among CRC recurrences identified in the actively followed cohort to estimate the sensitivity and specificity.

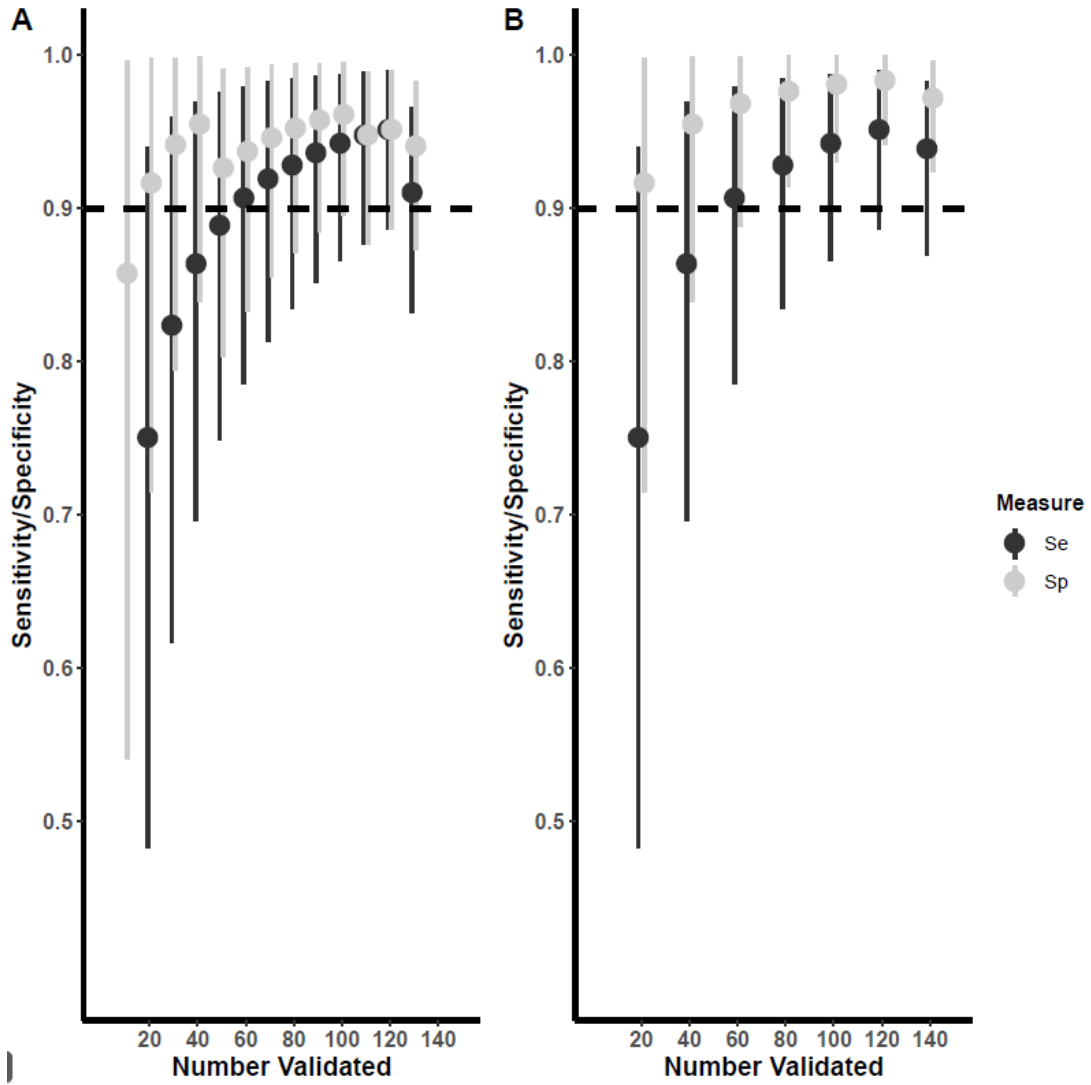

Supplement: Supplementary file 1 [file get_supplementary_file.php]
